# Supplementary material for: Bioactivity-Guided High Performance Counter-Current Chromatography and Following Semi-Preparative Liquid Chromatography Method for Rapid Isolation of Anti-Inflammatory Lignins from Dai Medicinal Plant, Zanthoxylum acanthopodium var. timbor
Source: MDPI journal article supplement (doi:10.3390/molecules28062592), 2023-03-13
Supplement: s1 [file s1]

## Article

# Bioactivity-guided High Performance Counter-current Chromatography and Following Semi-preparative Liquid Chromatography Method for Rapid Isolation of Anti-inflammatory Lignins from Dai Medicinal Plant, *Zanthoxylum acanthopodium* var. *timbor*

Qing-Fei Fan <sup>1,2,\*</sup>, Lan Zhou <sup>2,3,†</sup>, Pian-Chou Gongpan <sup>2</sup>, Chuan-Li Lu <sup>4</sup>, Hua Chang <sup>5</sup> and Xun Xiang <sup>6,\*</sup>

<sup>1</sup> College of Science, Yunnan Agricultural University, Kunming 650201, China

<sup>2</sup> CAS Key Laboratory of Tropical Plant Resources and Sustainable Use, Xishuangbanna Tropical Botanical Garden, Chinese Academy of Sciences, Xishuangbanna 666303, China

<sup>3</sup> College of Food and Drug Engineering, Guangxi Vocational University of Agriculture, Nanning 530007, China

<sup>4</sup> Institute of Bioengineering, Guangdong Academy of Sciences, Guangzhou 510316, China

<sup>5</sup> College of Veterinary Medicine, Yunnan Agricultural University, Kunming 650201, China

<sup>6</sup> College of Animal Science and Technology, Yunnan Agricultural University, Kunming 650201, China

\* Correspondence: fanqingfeijin@126.com (Q.-F.F.); xiangxun2000@163.com (X.X.)

† These authors contributed equally to this work.

**Citation:** Fan, Q.-F.; Zhou, L.; Gongpan, P.-C.; Lu, C.-L.; Chang, H.; Xiang, X. Bioactivity-Guided High Performance Counter-Current Chromatography and Following Semi-Preparative Liquid Chromatography Method for Rapid Isolation of Anti-Inflammatory Lignins from Dai Medicinal Plant, *Zanthoxylum acanthopodium* var. *timbor*. *Molecules* **2023**, *28*, 2592. <https://doi.org/10.3390/molecules28062592>

Academic Editors: Shihua Wu, Zhi Yang and Xinyi Huang

Received: 13 February 2023

Revised: 5 March 2023

Accepted: 9 March 2023

Published: 13 March 2023

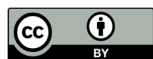

**Copyright:** © 2023 by the authors. Licensee MDPI, Basel, Switzerland. This article is an open access article distributed under the terms and conditions of the Creative Commons Attribution (CC BY) license (<https://creativecommons.org/licenses/by/4.0/>).

**Abstract:** The development of Dai medicine is relatively slow, and *Zanthoxylum* has great economic and medicinal value. It is still difficult to obtain medicinal components from the low-polarity parts of *Zanthoxylum* belonging to Dai medicine. In this study, we introduced one simple and quick strategy of separating target compounds from the barks of *Z. acanthopodium* var. *timbor* by high-performance countercurrent chromatography (HPCCC) with an off-line anti-inflammatory activity screening mode. The development of this strategy was based on the TLC-based generally useful estimation of solvent systems (GUESS) method and HPCCC in combination. This paper presented a rapid method for obtaining target anti-inflammatory compounds. Three lignins were enriched by HPCCC with an off-line inhibition mode of nitric oxide production in lipopolysaccharide-stimulated RAW264.7 macrophage cells, using petroleum ether–ethyl acetate–methanol–water (3:2:3:2) as the solvent system. The results showed that this method was simple and practical and could be applied to trace the anti-inflammatory components of the low-polarity part in Dai medicine.

**Keywords:** *Zanthoxylum acanthopodium* var. *timbor*; anti-inflammatory activity screening; high-performance countercurrent chromatography; preparative separation

## 1 Original spectra of isolated compounds 1-3

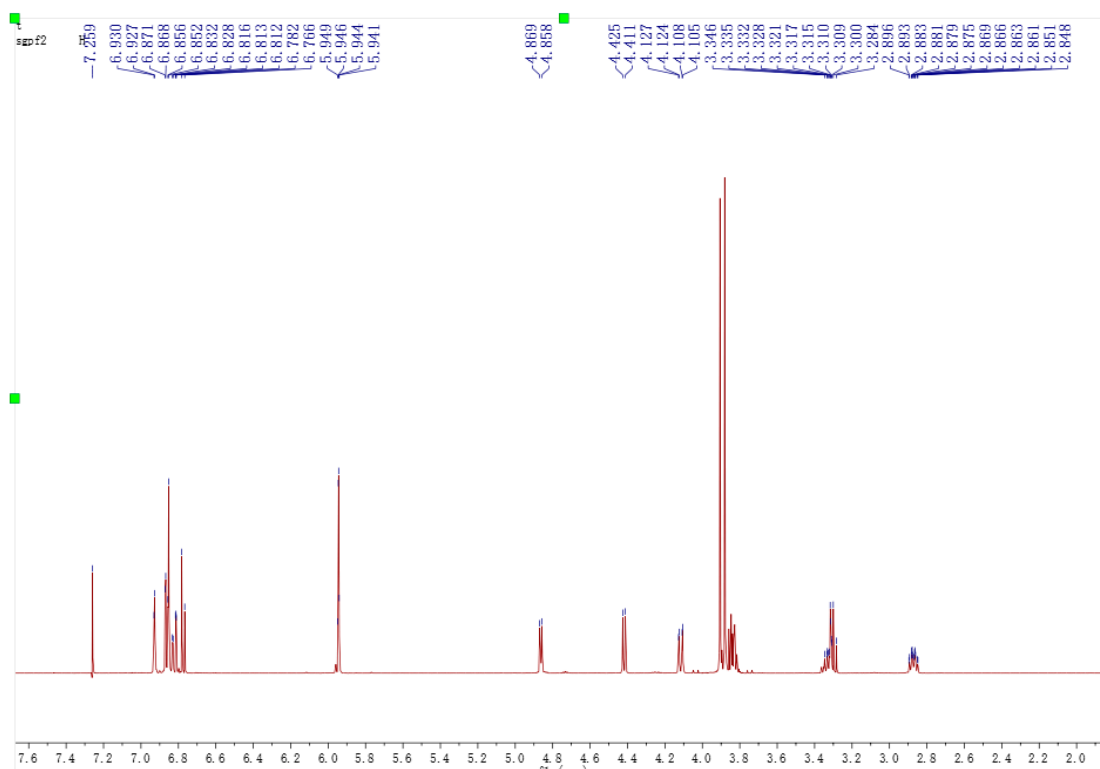

Figure S1. <sup>1</sup>H NMR of compound 1.

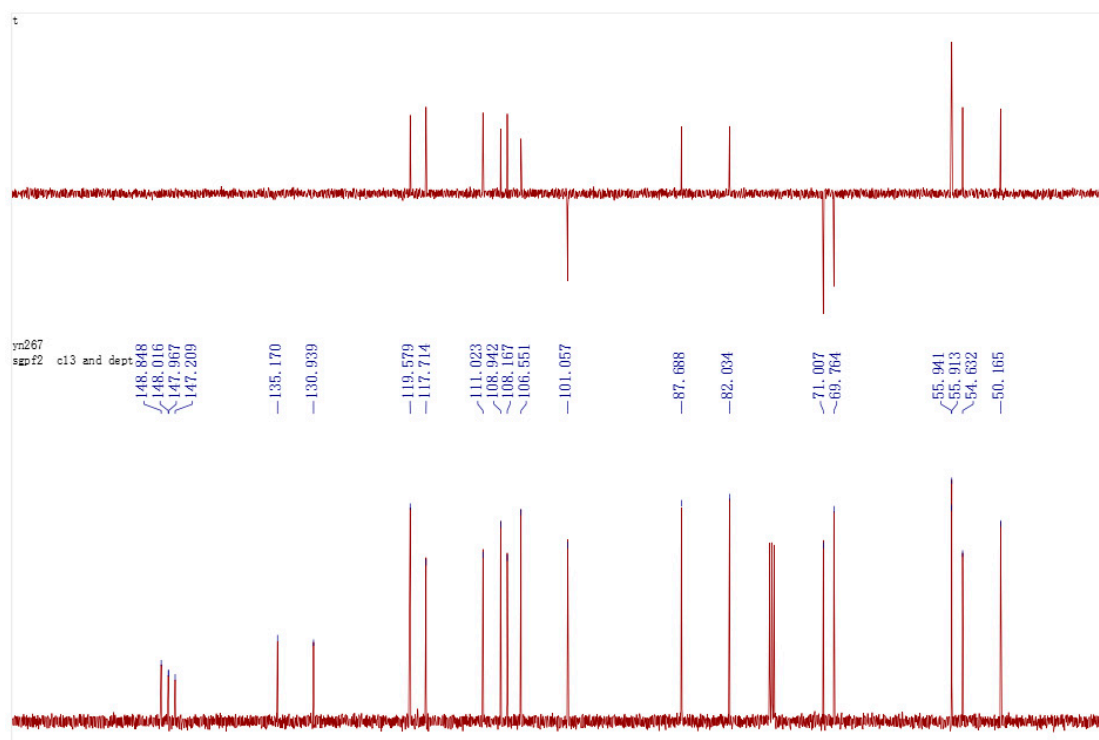

Figure S2. DEPT of compound 1.

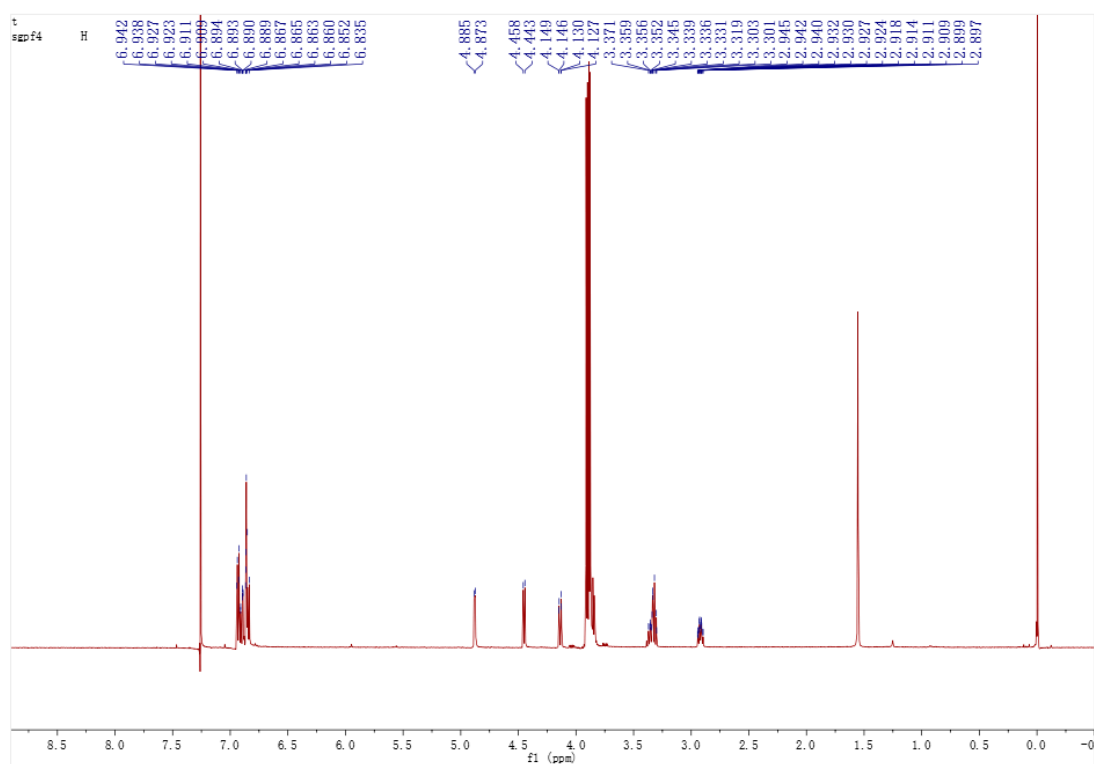Figure S3. <sup>1</sup>H NMR of compound 2.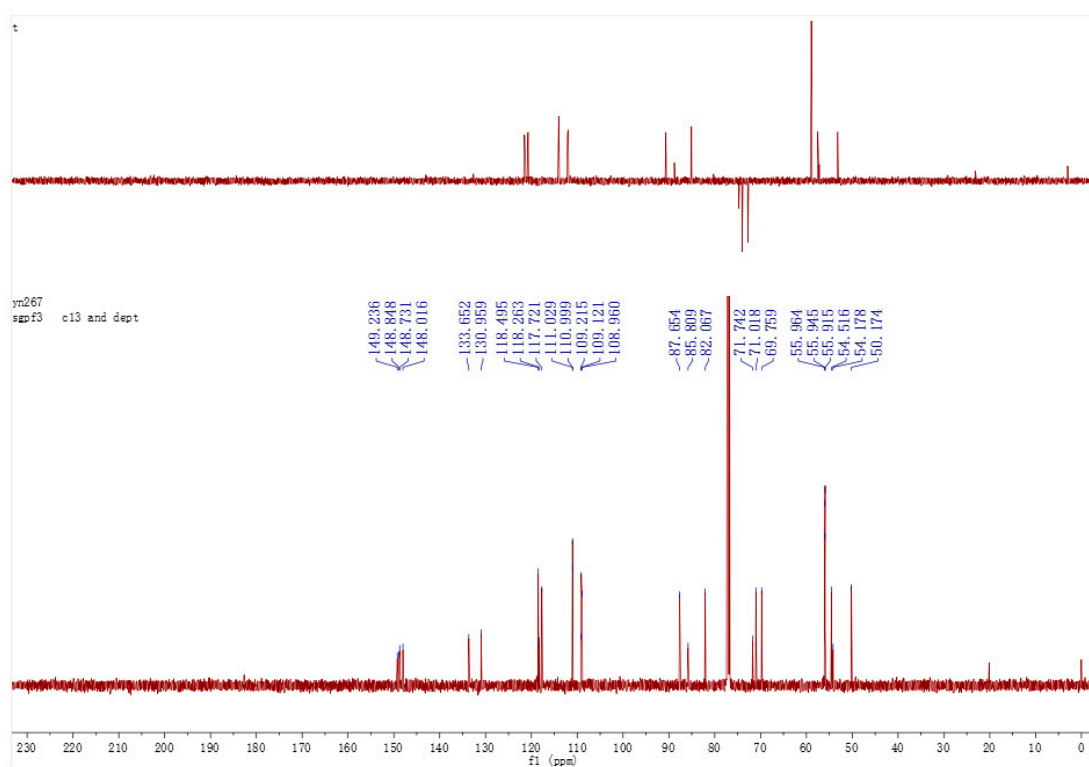

Figure S4. DEPT of compound 2.

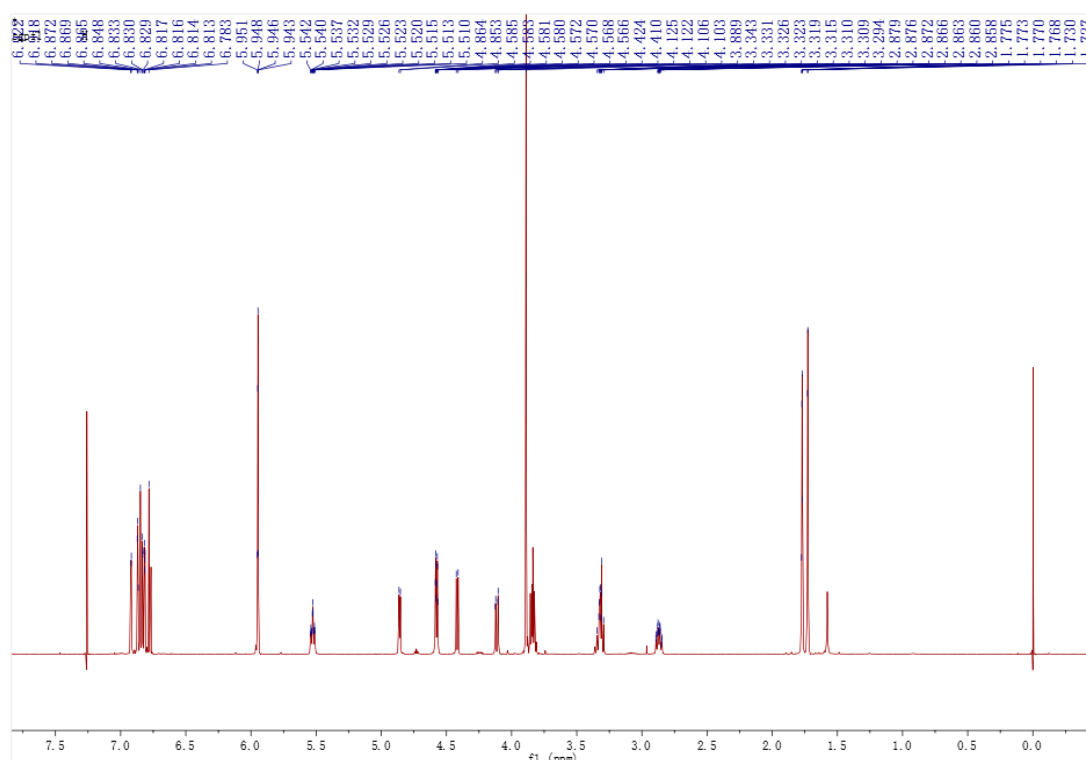Figure S5.  $^1\text{H}$ NMR of compound 3.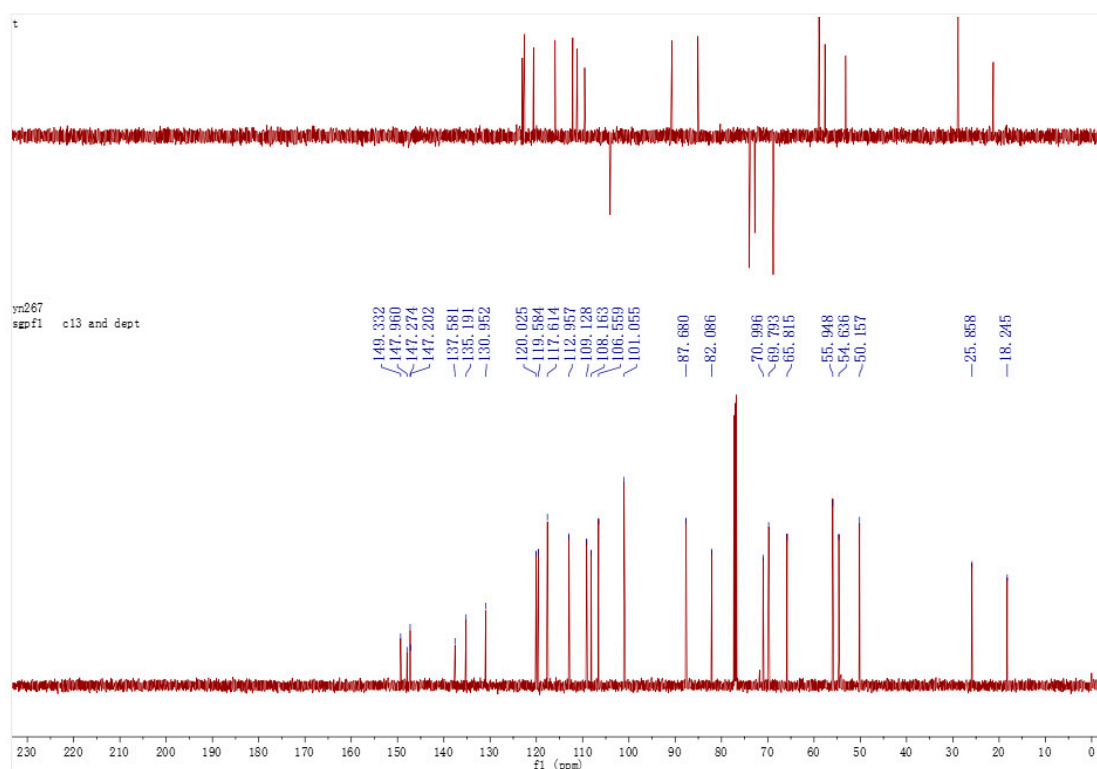

Figure S6. DEPT of compound 3.

**Disclaimer/Publisher's Note:** The statements, opinions and data contained in all publications are solely those of the individual author(s) and contributor(s) and not of MDPI and/or the editor(s). MDPI and/or the editor(s) disclaim responsibility for any injury to people or property resulting from any ideas, methods, instructions or products referred to in the content.
